# Supplementary material for: Effects of trivalent dopants on phase stability and catalytic activity of YBaCo4O7-based cathodes in solid oxide fuel cells
Source: Royal Society of Chemistry journal article supplement (doi:10.1039/c8ta01230j), 2018-01-01
Supplement: c8ta01230j1.pdf [file c8ta01230j1.pdf]

# Effect of Trivalent Dopants on Phase Stability and Catalytic Activity of YBaCo<sub>4</sub>O<sub>7</sub>-based Cathodes in Solid Oxide Fuel Cells

*Ke-Yu Lai and Arumugam Manthiram\**

Materials Science and Engineering Program & Texas Materials Institute, The University  
of Texas at Austin, Austin, TX, USA.

\*Corresponding Author: [rmanth@mail.utexas.edu](mailto:rmanth@mail.utexas.edu)

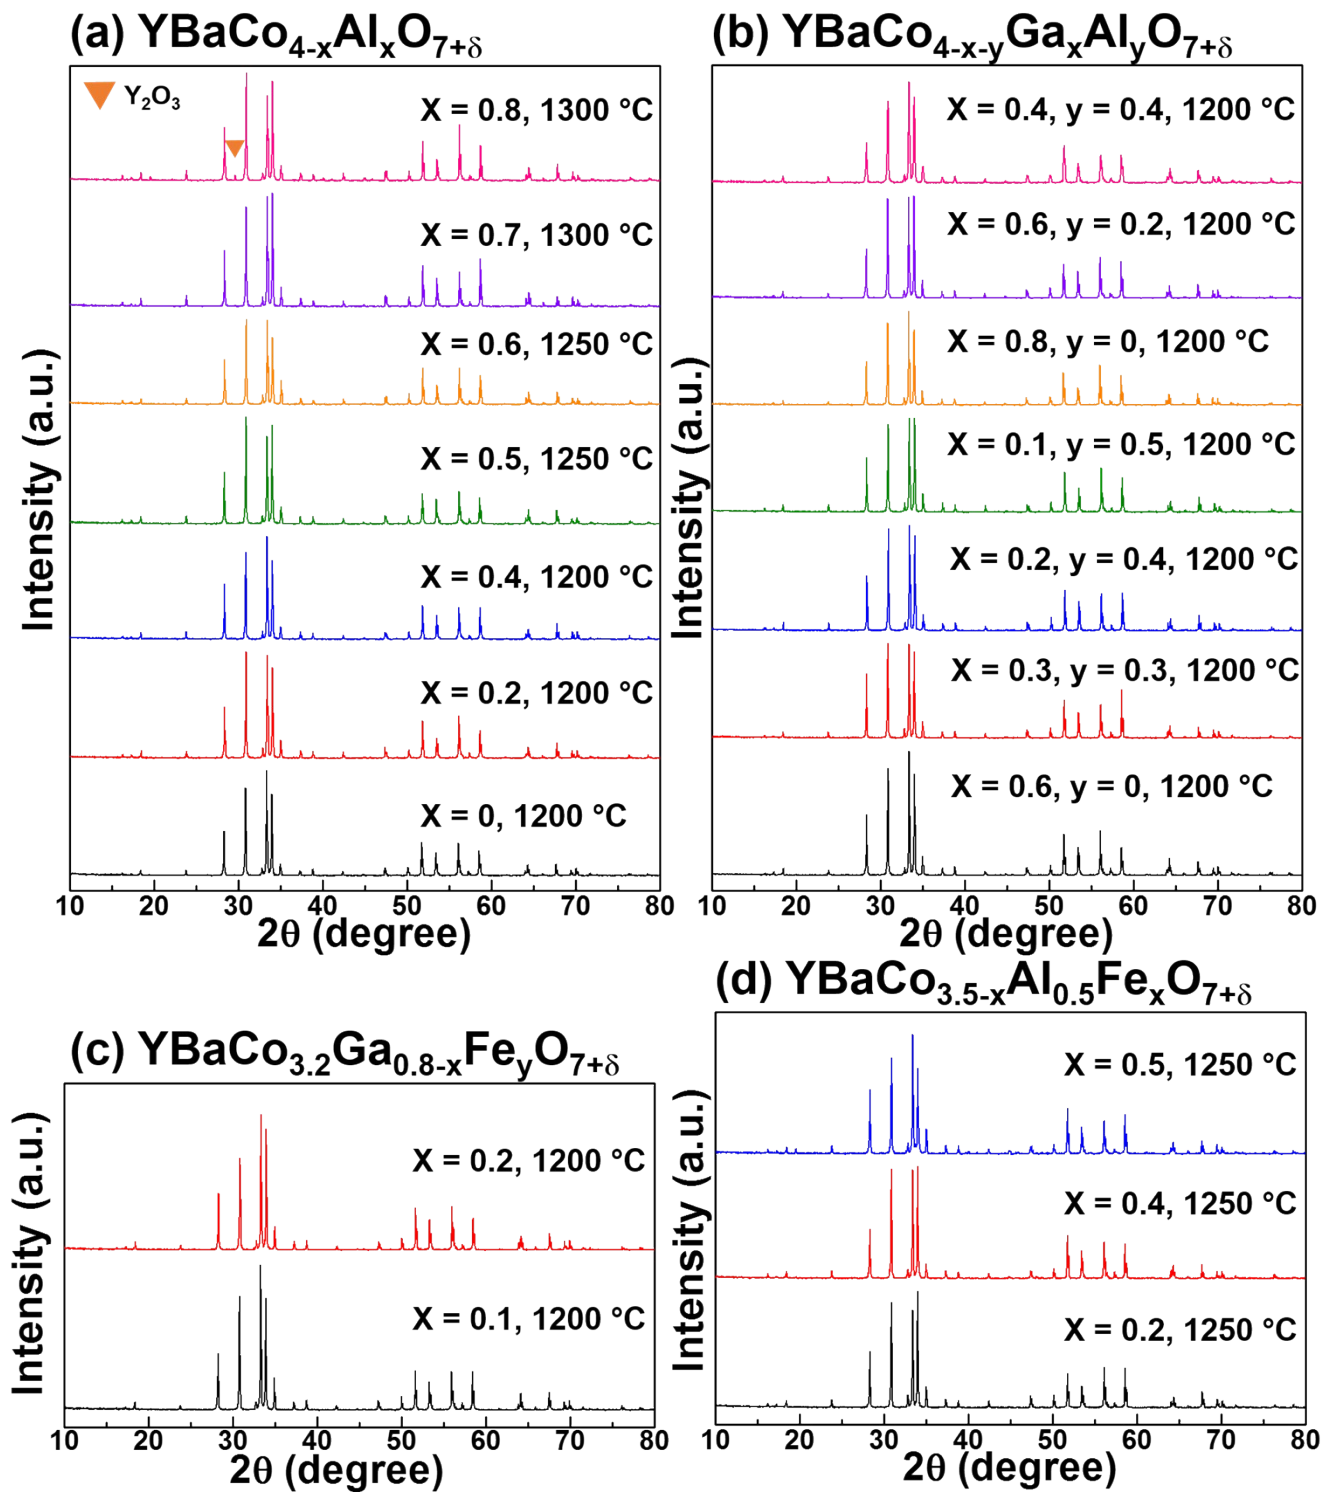

Fig. S1. XRD patterns of as-synthesized (a)  $\text{YBaCo}_{4-x}\text{Al}_x\text{O}_{7+\delta}$ , (b)  $\text{YBaCo}_{4-x-y}\text{Ga}_x\text{Al}_y\text{O}_{7+\delta}$ , (c)  $\text{YBaCo}_{4-x-y}\text{Ga}_x\text{Al}_y\text{O}_{7+\delta}$ , and (d)  $\text{YBaCo}_{3.5}\text{Al}_{0.5}\text{Fe}_x\text{O}_{7+\delta}$ . The sintering temperature is 1,200 °C for  $\text{YBaCo}_{4-x-y}\text{Ga}_x\text{Al}_y\text{O}_{7+\delta}$  and  $\text{YBaCo}_{4-x-y}\text{Ga}_x\text{Al}_y\text{O}_{7+\delta}$ . When the Al content in  $\text{YBaCo}_{4-x}\text{Al}_x\text{O}_{7+\delta}$  and  $\text{YBaCo}_{3.5}\text{Al}_{0.5}\text{Fe}_x\text{O}_{7+\delta}$  exceeds 0.5 in the formula, the final sintering temperature is over 1200 °C.

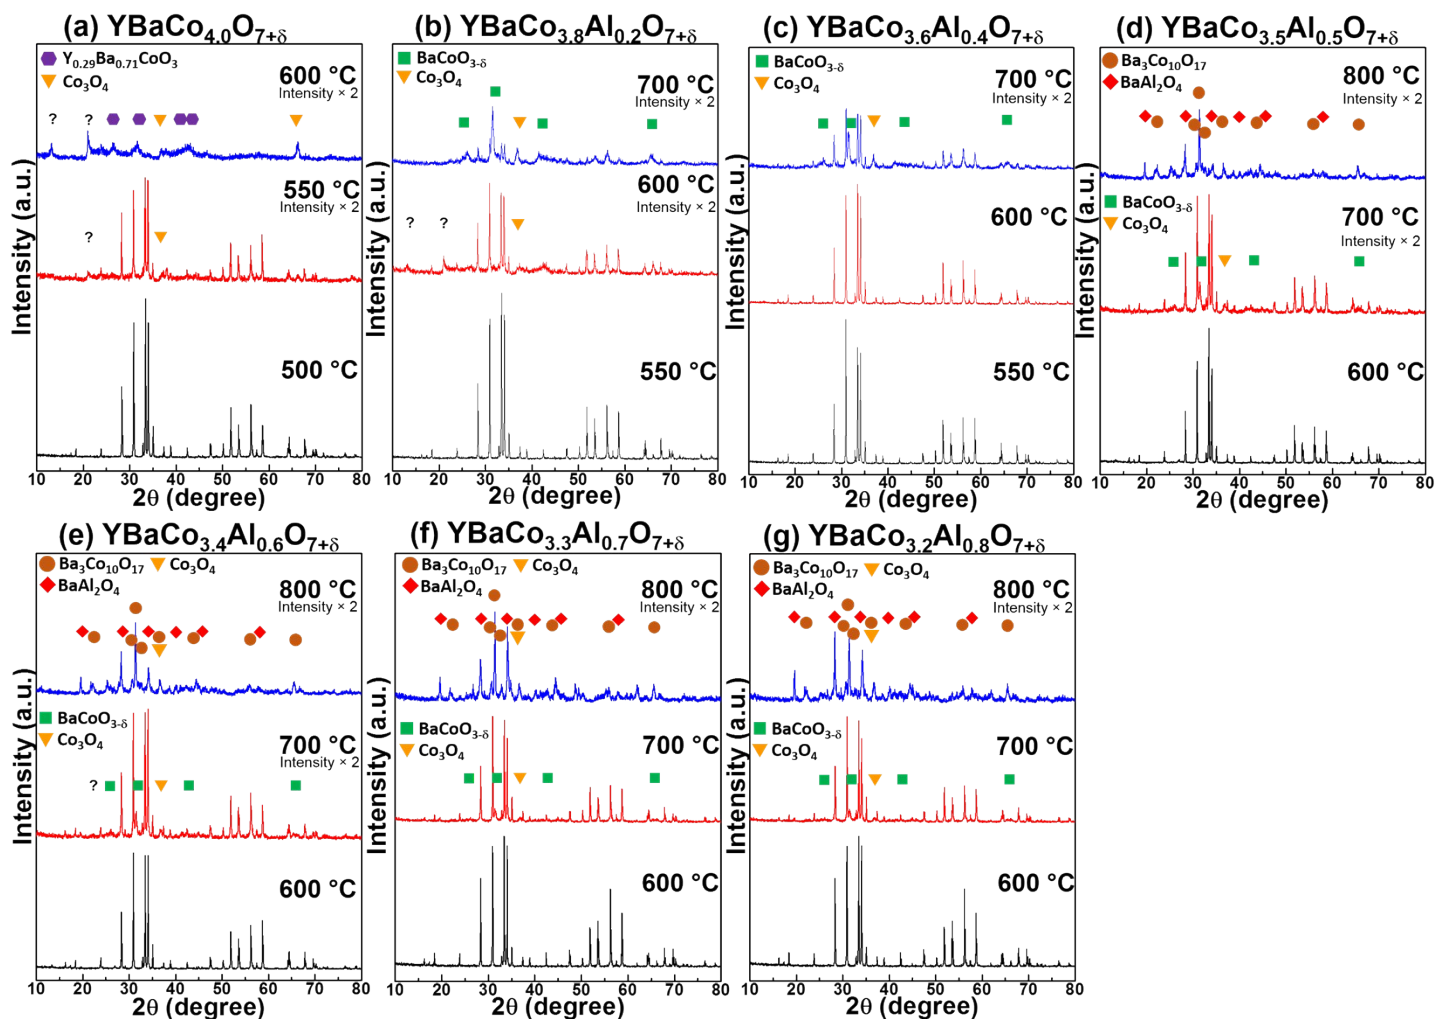

Fig. S2. RT-XRD patterns of the (a)  $\text{YBaCo}_4\text{O}_{7+\delta}$ , (b)  $\text{YBaCo}_{3.8}\text{Al}_{0.2}\text{O}_{7+\delta}$ , (c)  $\text{YBaCo}_{3.6}\text{Al}_{0.4}\text{O}_{7+\delta}$ , (d)  $\text{YBaCo}_{3.5}\text{Al}_{0.5}\text{O}_{7+\delta}$ , (e)  $\text{YBaCo}_{3.4}\text{Al}_{0.6}\text{O}_{7+\delta}$ , (f)  $\text{YBaCo}_{3.3}\text{Al}_{0.7}\text{O}_{7+\delta}$ , and (g)  $\text{YBaCo}_{3.2}\text{Al}_{0.8}\text{O}_{7+\delta}$  samples annealed at various temperatures for 120 h. The intensities of the decomposed samples decrease significantly, so the intensity of some XRD pattern is doubled for clarity, which is noted in the figure. Impurity peaks of an unknown phase is marked as “?”.

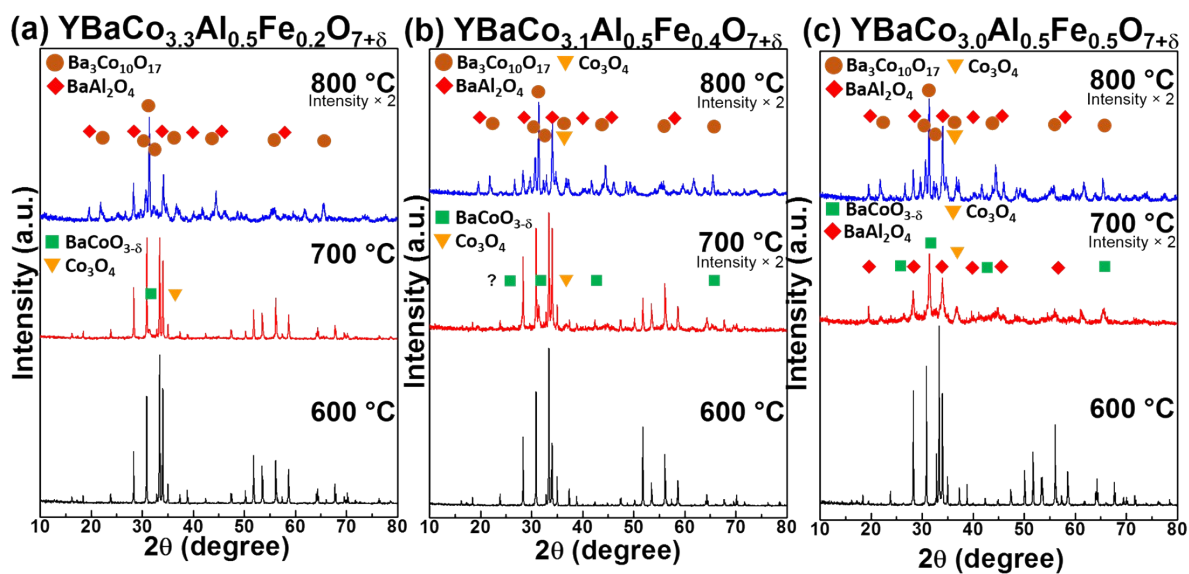

Fig. S3. RT-XRD patterns of the (a)  $\text{YBaCo}_{3.3}\text{Al}_{0.5}\text{Fe}_{0.2}\text{O}_{7+\delta}$ , (b)  $\text{YBaCo}_{3.1}\text{Al}_{0.5}\text{Fe}_{0.4}\text{O}_{7+\delta}$ , and (c)  $\text{YBaCo}_{3.0}\text{Al}_{0.5}\text{Fe}_{0.5}\text{O}_{7+\delta}$  samples annealed at 600 - 800 °C for 120 h. The intensities of the decomposed samples decrease significantly, so the intensity of some XRD pattern is doubled for clarity, which is noted in the figure.
